# Supplementary material for: Intrinsically Disordered SRC-3/AIB1 Protein Undergoes Homeostatic Nuclear Extrusion by Nuclear Budding While Ectopic Expression Induces Nucleophagy
Source: MDPI journal article supplement (doi:10.3390/cells8101278), 2019-10-19

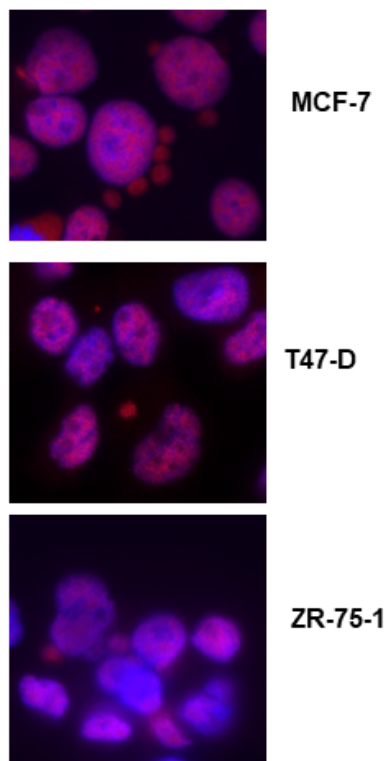

**Supplementary Figure 1:** Immunofluorescence demonstrates discrete SRC-3 cytoplasmic blebs in ER+ breast cancer cells. In these examples multiple juxtanuclear blebs are seen in MCF-7 cells while fewer T47-D and ZR-75-1 cells displayed blebbing (with a frequency of 1 bleb per positive cell) . IF intensity was enhanced in T47-D and ZR-75-1 relative to MCF-7 cells to better visualize SRC-3.

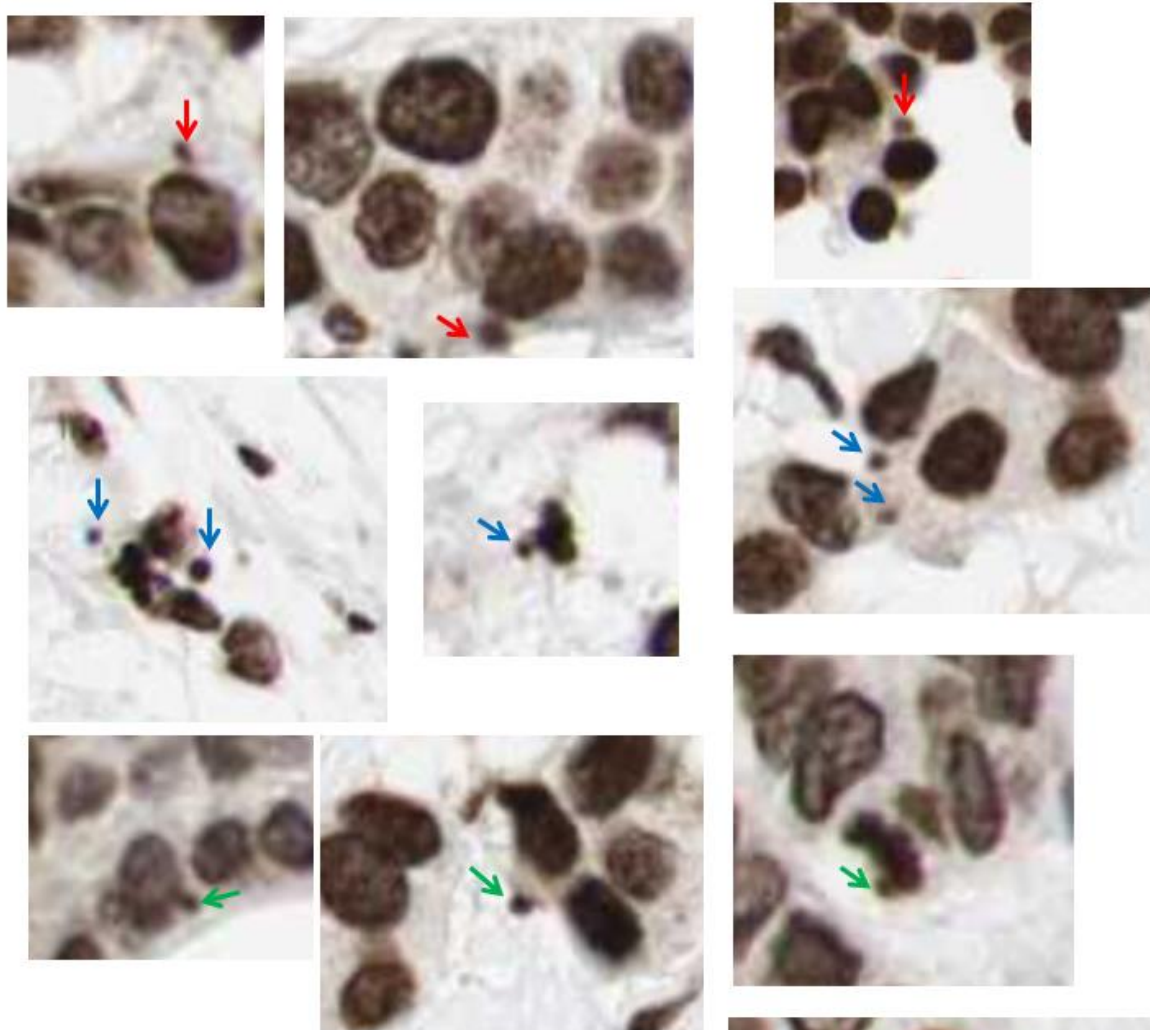

**Supplementary Figure 1:** Examples of anti-SRC-3 positive extranuclear budding structures in IHC of human breast cancers expressing high levels of SRC-3 indicated by arrows. Red arrows; id:1882 (medium staining/lobular ca) Blue arrows; id:3257 (high staining/ductal ca) Green arrows; id:2428 (high staining/ductal ca)

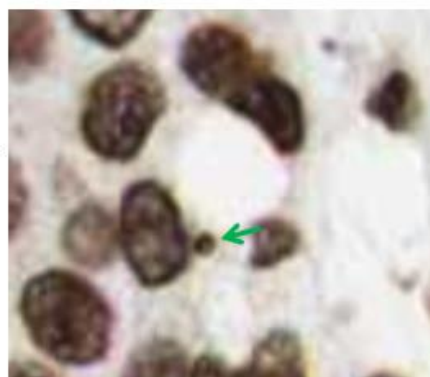

Supplement: s1 [file s1]
